## **A *Campylobacter* integrative and conjugative element with a CRISPR-Cas9 system targeting competing plasmids: a history of plasmid warfare?**

Arnoud H.M. van Vliet <sup>1,\*</sup>, Oliver Charity <sup>2</sup>, Mark Reuter <sup>2</sup>

1. School of Veterinary Medicine, Department of Pathology and Infectious Diseases, University of Surrey, Guildford, United Kingdom.
2. Quadram Institute Bioscience, Microbes in the Food Chain programme, Norwich, United Kingdom.

\* Corresponding author. Mailing address: School of Veterinary Medicine, University of Surrey, Daphne Jackson Road, Guildford GU2 7AL, United Kingdom. Phone +44-1483-684406, E-mail: [a.vanvliet@surrey.ac.uk](mailto:a.vanvliet@surrey.ac.uk)

Running title: CRISPR-Cas on *Campylobacter* mobile elements

Keywords: *Campylobacter*, mobile genetic elements, plasmids, CRISPR-Cas

## 1 ABSTRACT

2 Microbial genomes are highly adaptable, with mobile genetic elements (MGEs) such as  
3 integrative conjugative elements (ICE) mediating the dissemination of new genetic information  
4 throughout bacterial populations. This is countered by defence mechanism such as CRISPR-Cas  
5 systems, which limit invading MGEs by sequence-specific targeting. Here we report the distribution  
6 the pVir, pTet and PCC42 plasmids and a new 70-129 kb ICE (CampyICE1) in the foodborne  
7 microbial pathogens *Campylobacter jejuni* and *Campylobacter coli*. CampyICE1 contains a  
8 degenerated Type II-C CRISPR system consisting of a sole Cas9 protein, which is distinct from the  
9 previously described Cas9 proteins from *C. jejuni* and *C. coli*. CampyICE1 is conserved in structure  
10 and gene order, containing modules of genes predicted to be involved in recombination, regulation,  
11 and conjugation. CampyICE1 was detected in 134/5,829 (2.3%) *C. jejuni* genomes and 92/1,347  
12 (6.8%) *C. coli* genomes. Similar ICE were detected in a number of non-*jejuni/coli* *Campylobacter*  
13 species, although these lacked a CRISPR-Cas system. CampyICE1 carries 3 separate short CRISPR  
14 spacer arrays containing a combination of 108 unique spacers and 16 spacer variant families, of  
15 which 70 spacers were predicted to target the *Campylobacter* plasmids pVir, pTet, and pCC42. A  
16 further nine spacers were predicted to target other *Campylobacter* plasmids (63.7%). The presence  
17 of a functional CampyICE1 Cas9 protein and matching anti-plasmid spacers was associated with  
18 the absence of these plasmids (188/214 genomes, 87.9%), implicating that the CampyICE1-encoded  
19 CRISPR-Cas has contributed to the exclusion of competing plasmids. In conclusion, the  
20 characteristics of the CRISPR-Cas9 system on CampyICE1 suggests a history of plasmid warfare in  
21 *Campylobacter*.

22

## 23 **IMPACT STATEMENT**

24       Understanding pathogen evolution is paramount for enhancing food safety and limiting  
25 pathogenic disease in humans and animals. *Campylobacter* species comprise a group of human and  
26 animal pathogens with a remarkable success rate, being the most frequent cause of bacterial food-  
27 borne disease in high-income countries. A common theme among *Campylobacter* evolution is  
28 genomic plasticity, which underlies their variation. A significant proportion of this plasticity is  
29 driven by horizontal gene transfer (HGT) that results in acquisition of complex traits in one  
30 evolutionary event. Understanding the mechanisms of transfer of MGEs and how MGEs such as  
31 integrative conjugative elements (ICE) exclude other MGEs is fundamental to understanding  
32 *Campylobacter* evolution. CRISPR-Cas9 proteins play a role in bacterial immune systems,  
33 mediating the defence against bacteriophage, plasmids, and integrative elements. The use of  
34 CRISPR-Cas by an mobile element to fight off competing elements, possibly to advantage or  
35 detriment to their host, also increases our understanding of how important selfish genomic islands  
36 undergo co-evolution with bacterial pathogens, and generates insight into the complex warfare  
37 between MGEs.

38

## 39 **DATA STATEMENT**

40       All genome sequences used in this study are available on the National Center for  
41 Biotechnology Information (NCBI) Genome database or in the *Campylobacter* PubMLST website;  
42 the assembly accession numbers (NCBI Genome) or genome ID numbers (*Campylobacter*  
43 PubMLST) are listed in Table S1 (available in the online version of this article). CRISPR Spacer  
44 sequences and predicted targets, Cas9 alignments, presence of mobile elements and plasmids are all  
45 included in the Supplementary Information.

46

## 47 INTRODUCTION

48 The genus *Campylobacter* is a member of the Epsilonproteobacteria, and comprises gram-  
49 negative bacteria that are commonly found in the intestines of warm-blooded animals. The best  
50 studied members of the genus *Campylobacter* are *C. jejuni* and *C. coli*, which are closely related  
51 thermophilic *Campylobacter* species commonly found in birds and animals involved in agriculture,  
52 i.e. poultry, cattle and pigs, while they are also found in many wild birds [1, 2]. They jointly  
53 represent the most common bacterial human diarrhoeal pathogens in the developed world, with  
54 transmission often foodborne via undercooked meat and cross-contamination in kitchen  
55 environments [3, 4]. Other related *Campylobacter* species include the recently described *C.*  
56 *hepaticus* found in poultry [5], *C. upsaliensis* which is a zoonotic *Campylobacter* species from dogs  
57 and cats [6], and the *C. lari* group consisting of several species isolated from birds and animals  
58 connected to coastal environments [7].

59 Horizontal gene transfer (HGT) plays a major role in the evolution of microbial genomes [8].  
60 Phages and plasmids underlie HGT-driven genomic plasticity, with transfer conducted by  
61 transduction or conjugation, or alternatively by natural transformation and recombination [9]. One  
62 class of mobile genetic elements (MGE) are the integrative and conjugative elements (ICE), which  
63 are self-transferable elements that can mediate excision, form a circular intermediate and often  
64 encode the genes for the Type IV conjugative pili used for transfer to a new recipient host cell [10,  
65 11]. ICEs often contain genes required for reversible site-specific recombination, conjugation and  
66 regulation, but also carry "cargo" genes that may confer antimicrobial resistance, virulence  
67 properties or metabolic capabilities to recipient cells [12], as well as addiction modules ensuring  
68 stable maintenance within the host cell [13].

69 Although acquisition of new genetic traits via HGT may have significant benefits for the  
70 recipient cell, the newly acquired sequences can also be detrimental to the host. Therefore cells  
71 have developed a diverse set of mechanisms to control entry, integration and expression of foreign

72 DNA [14]. One such system is the Clustered Regularly Interspaced Short Palindromic Repeats  
73 (CRISPR) and proteins encoded by CRISPR-associated (Cas) genes, which encode the components  
74 of a RNA-guided, sequence-specific immune system against invading nucleic acids, often phages,  
75 plasmids and other transferable elements [15]. Many CRISPR-Cas systems have the Cas1 and Cas2  
76 proteins mediating spacer acquisition [16] and other Cas proteins involved in expression,  
77 maturation/processing and targeting and interference of the foreign DNA or RNA sequences,  
78 commonly phages and plasmids [17]. The RNA-guided endonuclease of the Type II CRISPR-Cas  
79 system is the Cas9 (Csn1/Csx12) protein, which mediates processing of crRNAs and subsequent  
80 interference with the targets, in combination with a guide RNA (tracrRNA) [18].

81 Early studies using multilocus sequence typing (MLST) indicated a high level of genetic  
82 variability in *Campylobacter* species such as *C. jejuni* and *C. coli* [19], and subsequent comparative  
83 genomic analyses have shown that this level of genetic variability is achieved by differences in  
84 genetic content and high levels of allelic variability [20-22], likely supported by the natural  
85 competence of many *Campylobacter* species. Along with a variety of small plasmids (<10 kb),  
86 there are three major classes of 30-60 kb plasmids in *C. jejuni* and *C. coli* (pVir, pTet and pCC42)  
87 [23-25], although these are of variable size and gene content [26]. There are also four  
88 chromosomally located MGEs first identified in *C. jejuni* RM1221 [27], of which CJIE1 is a Mu-  
89 like prophage, CJIE2 and CJIE4 are related temperate prophages [28-31], and CJIE3 is a putative  
90 ICE which can contain the *Campylobacter* Type VI secretion system (T6SS) [32, 33].

91 In a previous study, we showed that 98% of *C. jejuni* genomes investigated contain a Type II-C  
92 CRISPR-Cas system consisting of *cas9-cas1-cas2* genes and a relatively short spacer array ( $4.9 \pm$   
93  $2.7$  spacers, N=1,942 genomes) [34]. In contrast, only 10% of *C. coli* genomes contained a copy of  
94 the *C. jejuni* CRISPR-Cas system, while genomes from non-agricultural (riparian) *C. coli* isolates  
95 contained a closely related, but separate Type II-C CRISPR-Cas system with the full complement of  
96 *cas9-cas1-cas2* genes, or an orphan *cas9* gene without *cas1* or *cas2* genes [34]. We have expanded

97 this survey of CRISPR-Cas systems in *C. jejuni* and *C. coli*, and show that there is a third, clearly  
98 distinct CRISPR-Cas system in both *C. jejuni* and *C. coli*, which is located on a relatively conserved  
99 chromosomally located ICE (CampyICE1), which represents a family of conjugative plasmids and  
100 integrative elements present in related *Campylobacter* species. Finally, two-thirds of the CRISPR  
101 spacers on the CampyICE1 element are predicted to target pVir, pTet, pCC42 and other  
102 *Campylobacter* plasmids, consistent with an involvement of this CRISPR-Cas element in  
103 competition between *Campylobacter* MGEs.  
104

## 105 MATERIALS AND METHODS

106

### 107 Identification of CRISPR-Cas systems

108 A collection of complete and draft genome sequences of *C. jejuni* (N=5,829) and *C. coli*  
109 (N=1,347) (Table S1) were obtained from the NCBI Genomes database  
110 (<http://www.ncbi.nlm.nih.gov/genome/browse/>) and the *Campylobacter* pubMLST website  
111 (<http://pubmlst.org/campylobacter/>) [35], and have been used in previous studies on gene  
112 distribution in *Campylobacter* [36, 37]. Genome sequences for non-jejuni/coli *Campylobacter*  
113 species such as *C. hepaticus*, *C. lari* group and *C. upsaliensis* were obtained from the NCBI genome  
114 database using ncbi-genome-download version 0.2.11 ([https://github.com/kblin/ncbi-genome-](https://github.com/kblin/ncbi-genome-download/)  
115 [download/](https://github.com/kblin/ncbi-genome-download/)). Genome sequences were annotated with Prokka version 1.13 [38], and the annotation  
116 searched for Cas9 orthologs using the *C. jejuni* Cj1523c (Cas9) amino acid sequence using  
117 BLASTP, while genome sequences were searched using TBLASTN to identify inactivated copies  
118 of *cas9* genes. CRISPR arrays were identified as described previously [34], using the CRISPRfinder  
119 software (<http://crispr.u-psud.fr/Server/>) [39] and the CRISPR Recognition Tool CRT [40], further  
120 supported by BLAST searches and manual curation. Conservation of sequences was represented  
121 using Weblogo [41].

122

### 123 Prediction of putative targets of CRISPR spacers

124 A total of 108 unique and 16 variant families of the CampyICE1 CRISPR spacer sequences  
125 were used as query on the CRISPRTarget website  
126 ([http://brownlabtools.otago.ac.nz/CRISPRTarget/crispr\\_analysis.html](http://brownlabtools.otago.ac.nz/CRISPRTarget/crispr_analysis.html)) [42], and used to search the  
127 Genbank-Phage, Refseq-Plasmid, and Refseq-Viral databases. Only *Campylobacter* targets were  
128 included for further analysis. Hits with plasmids from the pVir, pTet and pCC42 families were  
129 recorded. Individual genomes with plasmid-specific spacers and positive for either pVir, pTet or

130 pCC42 were searched for the target sequences of that genome using BLAST.

131

### 132 **Analysis of MGE and plasmid distribution**

133 Genome sequences were screened using Abricate (<https://github.com/tseemann/abricate>)  
134 version 0.9.8, with each mobile element/plasmid subdivided into 600 nt fragments used as  
135 individual queries, and each 600 nt query sequence was only scored positive with a minimum  
136 coverage of 70% and minimum sequence identity of 80%. The CJIE1, CJIE2, CJIE3 and CJIE4  
137 elements were obtained from *C. jejuni* reference strain RM1221 [27]. Nucleotide positions in the  
138 RM1221 genome (accession number CP000025) were 207,005-244,247 (CJIE1), 498,503-538,770  
139 (CJIE2), 1,021,082-1,071,873 (CJIE3), and 1,335,703:1,371,932 (CJIE4). The T6SS genes were  
140 taken from *C. jejuni* 108 (accession number JX436460). For the CampyICE1 element, genome  
141 sequences were screened with the CampyICE1 element from *C. jejuni* strain CCN26 (accession  
142 number FBML01, nucleotide positions contig 11: 109,469-134,196 and reverse strand contig 17:  
143 19,482-78,836), the Clade 1a *C. coli* strain RM1875 (accession number CP007183, nucleotide  
144 positions 1,235,330-1,320,414) and the *C. coli* Clade 2 strain C8C3 (accession number FBQX01,  
145 nucleotide positions 905,906-996,822). The pCC42 plasmid sequence was obtained from *C. coli* 15-  
146 537360 (accession number CP006703), whereas the pTet (accession number CP000549) and pVir  
147 (accession number CP000550) plasmid sequences were obtained from *C. jejuni* 81-176. Other  
148 plasmids used were pRM3194 (accession number CP014345), pHELV-1 (accession number  
149 CP020479) and pSCJK2-1 (accession number CP038863). Genomes were scored as positive for a  
150 mobile element or plasmid if >50% positive for 600 nt queries. Samples scoring between 30-50%  
151 were manually inspected for distribution of matches and given a final score. Clinker version 0.0.20  
152 [43] was used to generate comparative gene maps of MGE and plasmids, using the default settings.  
153 Table S1 includes the presence/absence information of the pCC42, pTet and pVir plasmids, and the  
154 CJIE1, CJIE2, CJIE3 and CJIE4 MGE.



155

156 **Phylogenetic trees**

157 Core genome MLST allelic profiles were generated for the 5,829 *C. jejuni* and 1,347 *C. coli*  
158 genomes using a 678 gene set described previously [44]. Allele calling was performed using  
159 chewBBACA version 2.6 [45] using the default settings. The phylogenetic trees were generated  
160 using GrapeTree version 1.5.0 [46] with the RapidNJ implementation of Neighbor-Joining, and  
161 annotated using the standard 7-gene MLST clonal complexes as determined using the MLST  
162 program version 2.19 (<https://github.com/tseemann/mlst>).

163 Cas9 protein sequences were aligned with MEGA7 using the MUSCLE algorithm with the  
164 default settings [47], and phylogenetic trees constructed using the MEGA7 Neighbor-joining  
165 option, pairwise deletion and the Jones-Taylor-Thornton (JTT) model, with 500 bootstraps. Trees  
166 were visualised using MEGA7 [47] and Figtree version 1.4.2  
167 (<http://tree.bio.ed.ac.uk/software/figtree/>).

168

169 **RESULTS**

170

171 ***Campylobacter jejuni* and *C. coli* contain a third type II-C Cas9-encoding gene**

172 A collection of 5,829 *C. jejuni* and 1,347 *C. coli* genomes was searched for the presence of  
173 Cas9 orthologs using the *C. jejuni* NCTC11168 Cj1523c and *C. coli* 76639 BN865\_15240c amino  
174 acid sequences, representative of the two type II-C Cas9 proteins previously detected in *C. jejuni*  
175 and *C. coli* [34]. Next to the *cas9* genes representative of the *C. jejuni*/agricultural *C. coli* and the  
176 riparian *C. coli* genomes, a third *cas9* gene was detected in 134 (2.3%) of *C. jejuni* genomes and 92  
177 (6.8%) of *C. coli* genomes, predicted to encode a full-length 965 aa protein, with some genomes  
178 containing an interrupted ORF. This new *cas9* gene did not have adjacent *cas1* or *cas2* genes.  
179 Alignment of the predicted new Cas9 proteins from *C. jejuni* and the *C. coli* clades with Cas9  
180 proteins from *Campylobacter* and *Helicobacter* spp. showed the new Cas9 proteins to form a  
181 separate cluster (Fig. 1), suggesting these have originated from a different source than the default  
182 *Campylobacter* CRISPR-Cas systems. Alignment of the additional Cas9 proteins from *C. jejuni* and  
183 the different *C. coli* genetic clades showed that the three RuvC motifs, the HNH motif and R-rich  
184 region were all conserved (Fig. S1).

185

186 **The novel CRISPR-Cas system is located on an integrative conjugative mobile element**

187 We first looked for the genomic region containing the gene encoding the new Cas9 protein in  
188 completed *C. jejuni* and *C. coli* genomes. Only two complete *C. coli* genomes contained the  
189 additional *cas9* gene; an inactivated copy of the *cas9* gene was found on the *C. coli* RM1875  
190 genome (Clade 1a), while a complete copy of the gene was present on *C. coli* C8C3 (Clade 2). The  
191 *cas9* gene was flanked by a short CRISPR-repeat region with five to six repeats, similar to the  
192 *Campylobacter* repeat lengths reported previously [34]. Investigation of the surrounding genes  
193 showed the downstream presence of a putative Type IV conjugative transfer system, with *traG*,

194 *traN*, *traL* and *traE* genes, as well as a *parM* gene encoding the chromosome segregation protein  
195 ParM, while upstream of *cas9*, genes annotated as DNA primase, thymidine kinase, XerC tyrosine  
196 recombinase, and an integrase were detected, with the conjugative element and the integrase  
197 flanked by a tRNA gene (Fig. 2), thus matching the common components of an ICE [10]. We used  
198 the *C. coli* RM1875 and *C. coli* C8C3 genomic regions to search all 134 *C. jejuni* and 92 *C. coli*  
199 genomes for contigs matching these sequences, and ordered these contigs accordingly. We were  
200 able to reconstruct the corresponding genomic regions for 81 *C. coli* and 133 *C. jejuni* genomes,  
201 annotated these and each showed genetic synteny. The size of the ICE ranged from 70.0-129.3 kb  
202 (average 87.7 kb, n=214), started with a gene encoding a putative integrase (in Genbank often  
203 annotated as 30S ribosomal subunit protein), tyrosine recombinase XerC, and then six gene  
204 modules of which the third ends with the *cas9* gene, and the fourth and the fifth contain the  
205 conjugation proteins (Fig. 2A). Finally, the mobile element also contained up to three putative  
206 CRISPR arrays, each with at most a few repeats. The conservation of the mobile element within *C.*  
207 *jejuni* and *C. coli* is shown using three *C. coli* and three *C. jejuni* examples is shown in Figure 2B.

208 BLAST searches using Genbank identified orthologs of this ICE in *C. doylei*, where the  
209 element is split into two parts with the *cas9* gene-containing middle part lacking. Next to this there  
210 were also regions with sequence and gene structure similarity to *C. upsaliensis* plasmid pCU110  
211 and *C. iguaniorum* plasmid pCIG1485E, both lacking the *cas9* gene. Subsequent searches in other  
212 *Campylobacter* spp genomes in the Genbank database allowed the identification of other plasmids  
213 and potential ICE elements with similar layouts from diverse *Campylobacter* species such as *C.*  
214 *helveticus*, *C. insulaenigrae*, *C. lari* and *C. subantarcticus*, although none of those contained the  
215 *cas9* gene (Fig. S2). We have named the *cas9*-containing ICE element CampyICE1, and will use  
216 this designation for the remainder of this manuscript.

217

218 **Distribution of CampyICE1 and other mobile elements and linkage to MLST-clonal**

219 **complexes**

220 To assess whether the distribution of CampyICE1 and other MGEs was linked to specific  
221 MLST-types or isolation source, we screened a collection of 5,829 *C. jejuni* and 1,347 *C. coli*  
222 genomes [36] using BLAST+ for the presence of CampyICE1, CJIE1, CJIE2, CJIE3, CJIE4, the  
223 plasmids pVir, pTet, pCC42, and the CJIE3-associated T6SS (Table 1). The CJIE1 element was the  
224 most common in *C. jejuni*, while CJIE4 was the least common of the MGEs from *C. jejuni*  
225 RM1221, although still more common than CampyICE1. In *C. coli*, the CJIE1, CJIE2 and CJIE3  
226 elements were present in similar fractions, and again much more common than CJIE4 and  
227 CampyICE1 (Table 1). There was clear variation within the CJIE1-CJIE4 genetic elements, mostly  
228 in length but also in gene content (Fig. S3), with the CJIE3 element differing due to the presence or  
229 absence of the T6SS. With regard to the three plasmids, pVir was rare in both *C. jejuni* and *C. coli*,  
230 while pTet is present in approximately a quarter of the *C. jejuni* and *C. coli* genomes. The pCC42  
231 plasmid was relatively rare in *C. jejuni*, but the most common plasmid in *C. coli* (Table 1). The  
232 plasmids showed more conservation of gene structure and content (Fig. S4), although there were  
233 combinations of plasmids and mobile elements that lead to megaplasmids with phage elements or  
234 the T6SS [48] which were not separately included in this analysis.

235 The *C. jejuni* genomes were clustered in a phylogenetic tree based on a 678 gene core genome  
236 (cg)MLST scheme [44], which grouped the genomes mostly according to clonal complexes of the  
237 seven-gene MLST for *C. jejuni* (Fig. 3) and the different *C. coli* clades (Fig. 4). With the exception  
238 of CJIE3 and the associated T6SS in *C. jejuni*, there was no clear association with specific MLST  
239 clonal complexes in either *C. jejuni* or *C. coli*. In *C. jejuni*, CJIE3 without the T6SS was restricted  
240 to clonal complexes ST-354 and ST-257, while the CJIE3 with T6SS was mostly found in clonal  
241 complexes ST-464, ST-353, ST-573 and ST-403 (Fig. 3). There was no obvious link between  
242 isolation source and any of the MGEs, although it should be noted that the dataset used is biased  
243 towards human isolates. Similar to the mobile elements, the pVir, pTet and pCC42 plasmids did not

244 show an association with either MLST clonal complex in *C. jejuni* or *C. coli* clade, or isolation  
245 source (Fig. 3, Fig. 4). The specific distribution per genome is provided in Table S1.

246

### 247 **The majority of CampyICE1 CRISPR spacers are predicted to target *Campylobacter* plasmids**

248 CRISPR arrays consist of the CRISPR repeats and the individual spacers, which are used to  
249 generate the cRNAs used for interference, and the tracrRNA [18]. The layout of the CampyICE1  
250 CRISPR arrays is distinct from most other Type II CRISPR-Cas systems, where the CRISPR array  
251 and tracrRNA are often found directly next to the Cas genes. In contrast, the CampyICE1 system  
252 does not contain the ubiquitous *cas1* and *cas2* genes, and has a total of three CRISPR arrays spaced  
253 over the element (Fig. 2). We were able to identify spacers from 81 *C. coli* and 133 *C. jejuni*  
254 CampyICE1 elements. The first array contained  $3.0 \pm 1.5$  spacers (N=197, range 1-6), and also  
255 contained a putative tracrRNA in the opposite transcriptional orientation (Fig. 5A), while the  
256 second CRISPR array contained  $3.1 \pm 1.7$  spacers (N=208, range 1-10) and lacked a potential  
257 tracrRNA. The third CRISPR array is shorter and contained  $1.0 \pm 0.6$  spacers (N=182, range 1-3).  
258 The tracrRNA and repeat sequence are distinct from the previously described *C. jejuni* and *C. coli*  
259 CRISPR systems [34], but matched the sequence differences between the repeat and tracrRNA (Fig.  
260 5A, 5B). The predicted Protospacer Adjacent Motif (PAM) was 5'-A(C/T)A(C/T) (Fig. 5A), which  
261 matches well with the 5'-ACAc PAM-motif described for the *C. jejuni* Cas9 protein [34, 49].

262 Comparison of the spacers from 214 CampyICE1 elements showed that these consisted of 108  
263 unique spacer sequences, and an additional 40 spacers that were subdivided in 16 variant families,  
264 where 2-6 spacers had one or two nucleotide differences to each other and were predicted to match  
265 the same targets (Table S2). The spacers were used to search phage and plasmid databases for  
266 putative targets, and a total of 60 unique spacers and seven variant families were predicted to target  
267 the *Campylobacter* plasmids pCC42 (31 unique spacers, two variants), pTet (16 unique spacers, six  
268 variants) and pVir (15 unique spacers, see Fig. 5C for an example). Furthermore there were spacers

269 predicted to target the *Campylobacter helveticus* plasmid pHELV-1 (one unique spacer) and  
270 pSCJK2-1 from *C. jejuni* SCJK2 (six unique spacers, two variants). The pHELV-1 and pSCJK2-1  
271 plasmids were not detected in the 5,829 *C. jejuni* and 1,347 *C. coli* genomes used in this study. The  
272 predicted targets on the plasmids pCC42, pTet and pVir were plotted against the plasmid maps (Fig.  
273 5D), and showed that targets for pCC42 and pVir were distributed all over the plasmids, whereas  
274 pTet was only targeted in two genes, of which YSU\_08860 is not universally present on pTet  
275 plasmids.

276

### 277 **Plasmid-mapping CampyICE1 CRISPR spacers are associated with an absence of the** 278 **corresponding plasmids**

279 To assess whether the CampyICE1 CRISPR-Cas9 system can function to exclude plasmid by  
280 using plasmid-mapping spacers, the 226 *C. jejuni* and *C. coli* CampyICE1-positive genome  
281 assemblies were compared for presence of plasmid contigs and matches with spacer sequences  
282 (Table 2). As one possible escape for CRISPR-Cas9 surveillance could be sequence  
283 mutations/changes in the plasmids, we also checked whether the predicted plasmid-matching spacer  
284 would recognise any sequence in the genome assemblies (which include plasmid contigs). Of the *C.*  
285 *coli* assemblies, spacers were detected in 81/92 assemblies, and 56 had no plasmid/spacer matches.  
286 Of the 25 assemblies where there were plasmid/spacer matches, three had an inactivated  
287 CampyICE1 *cas9* gene, and 11 did not have sequences matching the spacer(s) or only partial  
288 matches in their genome assembly, suggesting that mutations in the plasmid sequence have made  
289 the spacer unusable. This left 11 *C. coli* assemblies with a functional *cas9* gene and spacer matching  
290 the pCC42 plasmid. Similarly, for *C. jejuni*, spacers were detected in 133/134 genomes, and 109  
291 had no plasmid/spacer matches. Of the 24 assemblies where there were plasmid/spacer matches,  
292 two had an inactivated CampyICE1 *cas9* gene with frameshifts and stop codons, and seven did not  
293 have sequences matching the spacer(s) or only partial matches in their genome assembly. This left

294 15 *C. jejuni* assemblies with a functional *cas9* gene and spacer matching the pCC42 (seven) and  
295 pTet (eight) plasmids. The matching of spacers, CampyICE1 Cas9 status and plasmid  
296 presence/absence is given in Table 2, with more detailed data in Table S3.  
297

## 298 **DISCUSSION**

299 In the last 25 years, CRISPR-Cas has gone from a relatively obscure repeat system in bacteria  
300 to a Nobel Prize winning phenomenon [50]. CRISPR-Cas systems are widespread in prokaryotic  
301 organisms, and while early reports predicted them to be a bacterial version of the adaptive immune  
302 system against phages, it is now clear that they target a wide variety of MGEs, and can also have a  
303 diverse set of alternative functions. Recent studies show that CRISPR-Cas systems are not just  
304 located on genomes, but can also be found on MGEs. Type IV and Type I CRISPR-Cas systems  
305 have been reported on enterobacterial plasmids [51, 52], and have been predicted to function in  
306 competition between plasmids [53]. *Vibrionaceae* species contain a variety of CRISPR-Cas systems  
307 associated with putative MGEs and genomic islands [54, 55], although data on their potential role in  
308 MGE competition are still lacking. To our knowledge, our study is the first to feature an incomplete  
309 Type II-C CRISPR-Cas9 system that is associated with an MGE, and where the majority of spacers  
310 matched competing plasmids. We have shown that CampyICE1 is highly conserved in both *C.*  
311 *jejuni* and *C. coli*, that it has up to three short spacer arrays on the ICE, and that the presence of a  
312 functional CampyICE1 CRISPR-Cas system and anti-plasmid spacers is associated with the  
313 absence of the three targeted plasmid types in *C. jejuni* and *C. coli*.

314 The Type II-C Cas9 protein encoded on CampyICE1 is closely related to the Cas9 proteins  
315 found in other *Campylobacter* and *Helicobacter* species, but clusters separately, suggesting it may  
316 have been co-opted from a genomic location in an ancestral *Campylobacteraceae* species.  
317 Interestingly, it lacks the *cas1* and *cas2* genes that are required for the acquisition of new  
318 protospacers [56]. This could indicate that the CampyICE1 system is incapable of acquiring new  
319 spacers, which is supported by the relative lack of spacer diversity in the 214 genomes containing  
320 CampyICE1. However, we cannot exclude that the CampyICE1 Cas9 may be able to co-opt the  
321 Cas1 and Cas2 proteins from the chromosomal version of the CRISPR-Cas system in *C. jejuni* and  
322 *C. coli*. We have previously shown that ~98% of all *C. jejuni* genomes have a CRISPR-Cas system,



323 while this is more limited in *C. coli*, where only ~10% of *C. coli* genomes have a CRISPR-Cas  
324 system [34]. Since the diversity in CRISPR spacers is also low in the chromosomal version of  
325 CRISPR-Cas of *C. jejuni* and *C. coli* and most spacers cannot (yet) be linked to mobile elements or  
326 phages [34, 57-59], it may represent additional or alternative functions for Cas9 in *C. jejuni*, such as  
327 control or activity in virulence [60-64]. However, this is not the case for the CampyICE1 CRISPR-  
328 Cas9 system, as a majority of spacers can be linked to the three main families of plasmids in *C.*  
329 *jejuni* and *C. coli*: pTet, pVir and pCC42.

330 In our collection of genomes, 41.7% of *C. coli* and 24.3% of *C. jejuni* genomes are predicted to  
331 contain one or more of these three plasmids, in different combinations. The three plasmids do not  
332 show signs of incompatibility, as 93 *C. jejuni* and 166 *C. coli* genomes had a combination of two  
333 plasmids or all three plasmids together. The role of plasmids in *C. jejuni* and *C. coli* is still unclear;  
334 they can carry virulence factors and contribute to the dissemination of antibiotic resistance, but  
335 plasmids are not absolutely required for this, and plasmid-free isolates are common. This is similar  
336 for the CJIE elements, where different combinations of the CJIE-elements and CampyICE1 were  
337 detected. The different roles of the CJIE-elements in *C. jejuni* and *C. coli* is still not clear, although  
338 the T6SS from CJIE3 has been linked with virulence [32, 33, 65, 66], and the DNases of the CJIE1,  
339 CJIE2, and CJIE4 elements are associated with reduced biofilm formation and reduced natural  
340 transformation [29, 30, 67].

341 The CRISPR-Cas9 system of the CampyICE1 element has some unique properties, as there are  
342 up to three short CRISPR arrays on the mobile element, with the essential tracrRNA not located  
343 with the *cas9* gene but located in another CRISPR spacer array on CampyICE1. Although the arrays  
344 detected were small, there were still 108 unique spacers and 16 spacer families, with a spacer family  
345 defined as spacers differing by one or two nucleotides only. The majority of CampyICE CRISPR  
346 spacers and variants were predicted to target *Campylobacter* plasmids (69 spacers and 10 variants,  
347 63.7%), with most spacers predicted to target pCC42, pTet and pVir, the three major plasmids in *C.*

348 *jejuni* and *C. coli*, which is a very high proportion compared to many other CRISPR-Cas studies.  
349 For example, a study on type IV CRISPR-Cas systems could only match 12% of spacers with  
350 targets, and this was reduced to only 7% for the non-type IV CRISPR-Cas systems [53]. In our  
351 previous study [34] we were also unable to match most *Campylobacter* spacers with putative  
352 targets, which is common. The presence of CampyICE1, functional CRISPR-Cas9 and anti-plasmid  
353 spacers was associated with the absence of the competing plasmids targeted, suggesting that  
354 CampyICE1 has used its CRISPR-Cas9 system for "plasmid warfare" as a form of incompatibility.  
355 The match is not perfect, as there are several examples of a complete CampyICE1 CRISPR-Cas9  
356 system with plasmid-targeting spacers, to which the spacers mapped were present with 100%  
357 sequence identity between spacer and predicted plasmid contigs. This could mean that the system  
358 can prevent acquisition of new plasmids, but cannot remove plasmids already present, although  
359 speculative. It also suggests that the CampyICE1 plasmid restriction can be avoided by mutation of  
360 the target site disrupting the sequence matching, making the system less functional, especially in a  
361 bacterium known for its high levels of genetic variation. We also speculate that DNA modification  
362 and transcriptional variation/regulation may play a role in spacer-target discrepancies.

363 In summary, we have identified a new putative mobile element in *C. jejuni* and *C. coli* that  
364 contains a degenerated CRISPR-Cas9 system predicted to employ this CRISPR-Cas system to  
365 compete with other families of *Campylobacter* plasmids. We also show that mobile elements and  
366 plasmids are semi-randomly distributed within a large set of *C. jejuni* and *C. coli* genomes, and  
367 display significant levels of genetic variation within the elements. This fits well with the previously  
368 described genetic variability of the genus *Campylobacter*, and adds to the complexity of mobile  
369 elements present within these successful foodborne human pathogens.

370

## 371 **FUNDING INFORMATION**

372 We gratefully acknowledge the support of the Biotechnology and Biological Sciences Research

373 Council (BBSRC) via the BBSRC Institute Strategic Programme Grant BB/J004529/1 (Gut Health  
374 and Food Safety), and the BBSRC Doctoral Training Partnership to the Norwich Research Park  
375 (BB/M011216/1). The funder did not contribute to the study design, data collection, analysis or  
376 interpretation of the data.

377

## 378 **ACKNOWLEDGMENTS**

379 This publication made use of the PubMLST website (<http://pubmlst.org/>) developed by Keith  
380 Jolley and sited at the University of Oxford. The development of that website was funded by the  
381 Wellcome Trust.

382

## 383 **AUTHOR CONTRIBUTIONS**

384 A.H.M.v.V. conceived the study and study design, performed analysis and wrote the paper; O.C.  
385 and M.R. contributed to study design, performed analysis and writing of the paper.

386

## 387 **CONFLICTS OF INTEREST**

388 The authors declare that there are no conflicts of interest.

389

## REFERENCES

1. **Rossler E, Signorini ML, Romero-Scharpen A, Soto LP, Berisvil A et al.** Meta-analysis of the prevalence of thermotolerant *Campylobacter* in food-producing animals worldwide. *Zoonoses Public Health* 2019;66(4):359-369 doi: 10.1111/zph.12558
2. **Griekspoor P, Colles FM, McCarthy ND, Hansbro PM, Ashhurst-Smith C et al.** Marked host specificity and lack of phylogeographic population structure of *Campylobacter jejuni* in wild birds. *Mol Ecol* 2013;22(5):1463-1472 doi: 10.1111/mec.12144
3. **Nichols GL, Richardson JF, Sheppard SK, Lane C, Sarran C.** *Campylobacter* epidemiology: a descriptive study reviewing 1 million cases in England and Wales between 1989 and 2011. *BMJ Open* 2012;2(4):e001179 doi: 10.1136/bmjopen-2012-001179
4. **Romdhane RB, Merle R.** The Data Behind Risk Analysis of *Campylobacter Jejuni* and *Campylobacter Coli* Infections. *Curr Top Microbiol Immunol* 2021;431:25-58 doi: 10.1007/978-3-030-65481-8\_2
5. **Crawshaw T.** A review of the novel thermophilic *Campylobacter*, *Campylobacter hepaticus*, a pathogen of poultry. *Transbound Emerg Dis* 2019;66(4):1481-1492 doi: 10.1111/tbed.13229
6. **Campagnolo ER, Philipp LM, Long JM, Hanshaw NL.** Pet-associated *Campylobacteriosis*: A persisting public health concern. *Zoonoses Public Health* 2018;65(3):304-311 doi: 10.1111/zph.12389
7. **Miller WG, Yee E, Chapman MH, Smith TP, Bono JL et al.** Comparative genomics of the *Campylobacter lari* group. *Genome Biol Evol* 2014;6(12):3252-3266 doi: 10.1093/gbe/evu249
8. **Brockhurst MA, Harrison E, Hall JPJ, Richards T, McNally A et al.** The Ecology and Evolution of Pangenomes. *Curr Biol* 2019;29(20):R1094-R1103 doi: 10.1016/j.cub.2019.08.012
9. **Penades JR, Chen J, Quiles-Puchalt N, Carpena N, Novick RP.** Bacteriophage-mediated spread of bacterial virulence genes. *Curr Opin Microbiol*, Review 2014;23C:171-178 doi: 10.1016/j.mib.2014.11.019
10. **Johnson CM, Grossman AD.** Integrative and Conjugative Elements (ICEs): What They Do and How They Work. *Annu Rev Genet* 2015;49:577-601 doi: 10.1146/annurev-genet-112414-055018
11. **Delavat F, Miyazaki R, Carraro N, Pradervand N, van der Meer JR.** The hidden life of integrative and conjugative elements. *FEMS Microbiol Rev* 2017;41(4):512-537 doi: 10.1093/femsre/fux008

12. **Partridge SR, Kwong SM, Firth N, Jensen SO.** Mobile Genetic Elements Associated with Antimicrobial Resistance. *Clin Microbiol Rev* 2018;31(4):e00088-00017 doi: 10.1128/CMR.00088-17
13. **Burrus V.** Mechanisms of stabilization of integrative and conjugative elements. *Curr Opin Microbiol* 2017;38:44-50 doi: 10.1016/j.mib.2017.03.014
14. **Labrie SJ, Samson JE, Moineau S.** Bacteriophage resistance mechanisms. *Nat Rev Microbiol* 2010;8(5):317-327 doi: 10.1038/nrmicro2315
15. **Makarova KS, Wolf YI, Alkhnbashi OS, Costa F, Shah SA et al.** An updated evolutionary classification of CRISPR-Cas systems. *Nat Rev Microbiol* 2015;13(11):722-736 doi: 10.1038/nrmicro3569
16. **McGinn J, Marraffini LA.** Molecular mechanisms of CRISPR-Cas spacer acquisition. *Nat Rev Microbiol* 2019;17(1):7-12 doi: 10.1038/s41579-018-0071-7
17. **Hille F, Richter H, Wong SP, Bratovic M, Ressel S et al.** The Biology of CRISPR-Cas: Backward and Forward. *Cell* 2018;172(6):1239-1259 doi: 10.1016/j.cell.2017.11.032
18. **Makarova KS, Wolf YI, Iranzo J, Shmakov SA, Alkhnbashi OS et al.** Evolutionary classification of CRISPR-Cas systems: a burst of class 2 and derived variants. *Nat Rev Microbiol* 2020;18(2):67-83 doi: 10.1038/s41579-019-0299-x
19. **Sheppard SK, McCarthy ND, Falush D, Maiden MC.** Convergence of *Campylobacter* species: implications for bacterial evolution. *Science* 2008;320(5873):237-239 doi: 10.1126/science.1155532
20. **Baig A, McNally A, Dunn S, Paszkiewicz KH, Corander J et al.** Genetic import and phenotype specific alleles associated with hyper-invasion in *Campylobacter jejuni*. *BMC Genomics* 2015;16:852 doi: 10.1186/s12864-015-2087-y
21. **Sheppard SK, Jolley KA, Maiden MC.** A Gene-By-Gene Approach to Bacterial Population Genomics: Whole Genome MLST of *Campylobacter*. *Genes (Basel)* 2012;3(2):261-277 doi: 10.3390/genes3020261
22. **Yahara K, Meric G, Taylor AJ, de Vries SP, Murray S et al.** Genome-wide association of functional traits linked with *Campylobacter jejuni* survival from farm to fork. *Environ Microbiol* 2017;19(1):361-380 doi: 10.1111/1462-2920.13628
23. **Batchelor RA, Pearson BM, Friis LM, Guerry P, Wells JM.** Nucleotide sequences and comparison of two large conjugative plasmids from different *Campylobacter* species. *Microbiology* 2004;150(Pt 10):3507-3517 doi: 10.1099/mic.0.27112-0
24. **Pearson BM, Rokney A, Crossman LC, Miller WG, Wain J et al.** Complete genome sequence of the clinical isolate *Campylobacter coli* 15-537360. *Genome Announc*

- 2013;1(6):e01056-01013 doi: 10.1128/genomeA.01056-13
25. **Bacon DJ, Alm RA, Burr DH, Hu L, Kopecko DJ et al.** Involvement of a plasmid in virulence of *Campylobacter jejuni* 81-176. *Infect Immun* 2000;68(8):4384-4390 doi: 10.1128/iai.68.8.4384-4390.2000
  26. **Marasini D, Fakhr MK.** Complete Genome Sequences of Plasmid-Bearing Multidrug-Resistant *Campylobacter jejuni* and *Campylobacter coli* Strains with Type VI Secretion Systems, Isolated from Retail Turkey and Pork. *Genome Announc* 2017;5(47):e01360-01317 doi: 10.1128/genomeA.01360-17
  27. **Fouts DE, Mongodin EF, Mandrell RE, Miller WG, Rasko DA et al.** Major structural differences and novel potential virulence mechanisms from the genomes of multiple *campylobacter* species. *PLoS biology* 2005;3(1):e15 doi: 10.1371/journal.pbio.0030015
  28. **Parker CT, Quinones B, Miller WG, Horn ST, Mandrell RE.** Comparative genomic analysis of *Campylobacter jejuni* strains reveals diversity due to genomic elements similar to those present in *C. jejuni* strain RM1221. *J Clin Microbiol* 2006;44(11):4125-4135 doi: 10.1128/JCM.01231-06
  29. **Gaasbeek EJ, Wagenaar JA, Guilhabert MR, van Putten JP, Parker CT et al.** Nucleases encoded by the integrated elements CJIE2 and CJIE4 inhibit natural transformation of *Campylobacter jejuni*. *J Bacteriol*, Research Support, Non-U.S. Gov't 2010;192(4):936-941 doi: 10.1128/JB.00867-09
  30. **Gaasbeek EJ, Wagenaar JA, Guilhabert MR, Wosten MM, van Putten JP et al.** A DNase encoded by integrated element CJIE1 inhibits natural transformation of *Campylobacter jejuni*. *J Bacteriol* 2009;191(7):2296-2306 doi: 10.1128/JB.01430-08
  31. **Clark CG, Chen CY, Berry C, Walker M, McCorrister SJ et al.** Comparison of genomes and proteomes of four whole genome-sequenced *Campylobacter jejuni* from different phylogenetic backgrounds. *PLoS One* 2018;13(1):e0190836 doi: 10.1371/journal.pone.0190836
  32. **Bleumink-Pluym NM, van Alphen LB, Bouwman LI, Wosten MM, van Putten JP.** Identification of a Functional Type VI Secretion System in *Campylobacter jejuni* Conferring Capsule Polysaccharide Sensitive Cytotoxicity. *PLoS Pathog* 2013;9(5):e1003393 doi: 10.1371/journal.ppat.1003393
  33. **Lertpiriyapong K, Gamazon ER, Feng Y, Park DS, Pang J et al.** *Campylobacter jejuni* type VI secretion system: roles in adaptation to deoxycholic acid, host cell adherence, invasion, and in vivo colonization. *PLoS One* 2012;7(8):e42842 doi: 10.1371/journal.pone.0042842

34. **Pearson BM, Louwen R, van Baarlen P, van Vliet AHM.** Differential Distribution of Type II CRISPR-Cas Systems in Agricultural and Nonagricultural *Campylobacter coli* and *Campylobacter jejuni* Isolates Correlates with Lack of Shared Environments. *Genome Biol Evol* 2015;7(9):2663-2679 doi: 10.1093/gbe/evv174
35. **Jolley KA, Bray JE, Maiden MCJ.** Open-access bacterial population genomics: BIGSdb software, the PubMLST.org website and their applications. *Wellcome Open Res* 2018;3:124 doi: 10.12688/wellcomeopenres.14826.1
36. **Mehat JW, La Ragione RM, van Vliet AHM.** *Campylobacter jejuni* and *Campylobacter coli* autotransporter genes exhibit lineage-associated distribution and decay. *BMC Genomics* 2020;21(1):314 doi: 10.1186/s12864-020-6704-z
37. **Dwivedi R, Nothaft H, Garber J, Xin Kin L, Stahl M et al.** L-fucose influences chemotaxis and biofilm formation in *Campylobacter jejuni*. *Mol Microbiol* 2016;101(4):575-589 doi: 10.1111/mmi.13409
38. **Seemann T.** Prokka: rapid prokaryotic genome annotation. *Bioinformatics* 2014;30(14):2068-2069 doi: 10.1093/bioinformatics/btu153
39. **Grissa I, Vergnaud G, Pourcel C.** CRISPRFinder: a web tool to identify clustered regularly interspaced short palindromic repeats. *Nucleic Acids Res* 2007;35:W52-57 doi: 10.1093/nar/gkm360
40. **Bland C, Ramsey TL, Sabree F, Lowe M, Brown K et al.** CRISPR recognition tool (CRT): a tool for automatic detection of clustered regularly interspaced palindromic repeats. *BMC Bioinformatics* 2007;8:209 doi: 10.1186/1471-2105-8-209
41. **Crooks GE, Hon G, Chandonia JM, Brenner SE.** WebLogo: a sequence logo generator. *Genome Res* 2004;14(6):1188-1190 doi: 10.1101/gr.849004
42. **Biswas A, Gagnon JN, Brouns SJ, Fineran PC, Brown CM.** CRISPRTarget: Bioinformatic prediction and analysis of crRNA targets. *RNA Biol* 2013;10(5):817-827 doi: 10.4161/rna.24046
43. **Gilchrist CLM, Chooi YH.** Clinker & clustermap.js: Automatic generation of gene cluster comparison figures. *Bioinformatics* 2021:btab007 doi: 10.1093/bioinformatics/btab007
44. **Rossi M, Silva M, Ribeiro-Goncalves BF, Silva DN, Machado MP et al.** INNUENDO whole genome and core genome MLST schemas and datasets for *Campylobacter jejuni* (Version 1.0) [Data set]. *Zenodo* 2018:, doi: 10.5281/zenodo.1322564 doi:
45. **Silva M, Machado MP, Silva DN, Rossi M, Moran-Gilad J et al.** chewBBACA: A complete suite for gene-by-gene schema creation and strain identification. *Microb Genom* 2018;4(3):e000166 doi: 10.1099/mgen.0.000166

46. **Zhou Z, Alikhan NF, Sergeant MJ, Luhmann N, Vaz C et al.** GrapeTree: visualization of core genomic relationships among 100,000 bacterial pathogens. *Genome Res* 2018;28(9):1395-1404 doi: 10.1101/gr.232397.117
47. **Kumar S, G. S, Tamura K.** MEGA7: Molecular Evolutionary Genetics Analysis version 7.0 for bigger datasets. *Mol Biol Evol* 2016;33:1870-1874 doi: 10.1093/molbev/msw054
48. **Marasini D, Karki AB, Bryant JM, Sheaff RJ, Fakhr MK.** Molecular characterization of megaplasmids encoding the type VI secretion system in *Campylobacter jejuni* isolated from chicken livers and gizzards. *Sci Rep* 2020;10(1):12514 doi: 10.1038/s41598-020-69155-z
49. **Dugar G, Leenay RT, Eisenbart SK, Bischler T, Aul BU et al.** CRISPR RNA-Dependent Binding and Cleavage of Endogenous RNAs by the *Campylobacter jejuni* Cas9. *Mol Cell* 2018;69(5):893-905 doi: 10.1016/j.molcel.2018.01.032
50. **Barrangou R.** Nobel Dreams Come True for Doudna and Charpentier. *CRISPR J* 2020;3(5):317-318 doi: 10.1089/crispr.2020.29109.rba
51. **Newire E, Aydin A, Juma S, Enne VI, Roberts AP.** Identification of a Type IV-A CRISPR-Cas System Located Exclusively on IncHI1B/IncFIB Plasmids in Enterobacteriaceae. *Front Microbiol* 2020;11:1937 doi: 10.3389/fmicb.2020.01937
52. **Kamruzzaman M, Iredell JR.** CRISPR-Cas System in Antibiotic Resistance Plasmids in *Klebsiella pneumoniae*. *Front Microbiol* 2019;10:2934 doi: 10.3389/fmicb.2019.02934
53. **Pinilla-Redondo R, Mayo-Munoz D, Russel J, Garrett RA, Randau L et al.** Type IV CRISPR-Cas systems are highly diverse and involved in competition between plasmids. *Nucleic Acids Res* 2020;48(4):2000-2012 doi: 10.1093/nar/gkz1197
54. **McDonald ND, Regmi A, Morreale DP, Borowski JD, Boyd EF.** CRISPR-Cas systems are present predominantly on mobile genetic elements in *Vibrio* species. *BMC Genomics* 2019;20(1):105 doi: 10.1186/s12864-019-5439-1
55. **Labbate M, Orata FD, Petty NK, Jayatilleke ND, King WL et al.** A genomic island in *Vibrio cholerae* with VPI-1 site-specific recombination characteristics contains CRISPR-Cas and type VI secretion modules. *Sci Rep* 2016;6:36891 doi: 10.1038/srep36891
56. **Xiao Y, Ng S, Nam KH, Ke A.** How type II CRISPR-Cas establish immunity through Cas1-Cas2-mediated spacer integration. *Nature* 2017;550(7674):137-141 doi: 10.1038/nature24020
57. **Hooton S, D'Angelantonio D, Hu Y, Connerton PL, Aprea G et al.** *Campylobacter* bacteriophage DA10: an excised temperate bacteriophage targeted by CRISPR-cas. *BMC Genomics* 2020;21(1):400 doi: 10.1186/s12864-020-06808-3
58. **Hooton SP, Connerton IF.** *Campylobacter jejuni* acquire new host-derived CRISPR spacers when in association with bacteriophages harboring a CRISPR-like Cas4 protein. *Front*



- Microbiol* 2014;5:744 doi: 10.3389/fmicb.2014.00744
59. **Kovanen SM, Kivisto RI, Rossi M, Hanninen ML.** A combination of MLST and CRISPR typing reveals dominant *Campylobacter jejuni* types in organically farmed laying hens. *J Appl Microbiol* 2014;117(1):249-257 doi: 10.1111/jam.12503
60. **Louwen R, Horst-Kreft D, de Boer AG, van der Graaf L, de Knecht G et al.** A novel link between *Campylobacter jejuni* bacteriophage defence, virulence and Guillain-Barre syndrome. *Eur J Clin Microbiol Infect Dis*, Research Support, Non-U.S. Gov't 2013;32(2):207-226 doi: 10.1007/s10096-012-1733-4
61. **Saha C, Horst-Kreft D, Kross I, van der Spek PJ, Louwen R et al.** *Campylobacter jejuni* Cas9 Modulates the Transcriptome in Caco-2 Intestinal Epithelial Cells. *Genes (Basel)* 2020;11(10):1193 doi: 10.3390/genes11101193
62. **Saha C, Mohanraju P, Stubbs A, Dugar G, Hoogstrate Y et al.** Guide-free Cas9 from pathogenic *Campylobacter jejuni* bacteria causes severe damage to DNA. *Sci Adv* 2020;6(25):eaaz4849 doi: 10.1126/sciadv.aaz4849
63. **Shabbir MA, Wu Q, Shabbir MZ, Sajid A, Ahmed S et al.** The CRISPR-cas system promotes antimicrobial resistance in *Campylobacter jejuni*. *Future Microbiol* 2018;13:1757-1774 doi: 10.2217/fmb-2018-0234
64. **Shabbir MAB, Tang Y, Xu Z, Lin M, Cheng G et al.** The Involvement of the Cas9 Gene in Virulence of *Campylobacter jejuni*. *Front Cell Infect Microbiol* 2018;8:285 doi: 10.3389/fcimb.2018.00285
65. **Corcionivoschi N, Gundogdu O, Moran L, Kelly C, Scates P et al.** Virulence characteristics of hcp (+) *Campylobacter jejuni* and *Campylobacter coli* isolates from retail chicken. *Gut Pathog* 2015;7:20 doi: 10.1186/s13099-015-0067-z
66. **Liaw J, Hong G, Davies C, Elmi A, Sima F et al.** The *Campylobacter jejuni* Type VI Secretion System Enhances the Oxidative Stress Response and Host Colonization. *Front Microbiol* 2019;10:2864 doi: 10.3389/fmicb.2019.02864
67. **Brown HL, Reuter M, Hanman K, Betts RP, van Vliet AHM.** Prevention of biofilm formation and removal of existing biofilms by extracellular DNases of *Campylobacter jejuni*. *PLoS One* 2015;10(3):e0121680 doi: 10.1371/journal.pone.0121680

**Table 1.** Prevalence of chromosomal and extrachromosomal mobile elements in 5,829 *C. jejuni* and 1,347 *C. coli* genome assemblies.

| <b>Mobile element</b>           | <b><i>C. jejuni</i></b><br><b>(N=5,829)</b> | <b><i>C. coli</i></b><br><b>(N=1,347)</b> |
|---------------------------------|---------------------------------------------|-------------------------------------------|
| <b>Chromosomal elements</b>     |                                             |                                           |
| CampyICE1                       | 134 (2.3%)                                  | 92 (6.8%)                                 |
| CJIE1                           | 2,136 (36.6%)                               | 254 (18.9%)                               |
| CJIE2                           | 1,291 (22.1%)                               | 225 (16.7%)                               |
| CJIE3 with T6SS <sup>a</sup>    | 1,137 (19.5%)                               | 203 (15.1%)                               |
| CJIE3 without T6SS <sup>b</sup> | 537 (9.2%)                                  | 2 (0.1%)                                  |
| CJIE4                           | 798 (13.7%)                                 | 79 (5.9%)                                 |
| <b>Plasmids</b>                 |                                             |                                           |
| pCC42                           | 253 (4.3%)                                  | 383 (28.4%)                               |
| pTet                            | 1,177 (20.2%)                               | 1,337 (25.0%)                             |
| pVir                            | 84 (1.4%)                                   | 15 (1.1%)                                 |

a. Combined presence of the CJIE3 element and the type VI secretion system

b. Presence of the CJIE3 element, absence of the Type VI secretion system

**Table 2.** Distribution of CampyICE1 plasmid-specific CRISPR-spacers and pVir, pTet and pCC42 plasmids in CampyICE1-positive *C. jejuni* and *C. coli*.

| plasmid<br>spacer <sup>a</sup>  | no plasmid |                      | plasmid present |                                     |                      | CRISPR<br>effect <sup>c</sup> |
|---------------------------------|------------|----------------------|-----------------|-------------------------------------|----------------------|-------------------------------|
|                                 | absent     | matched <sup>b</sup> | absent          | $\Delta$ Cas9+mismatch <sup>b</sup> | matched <sup>b</sup> |                               |
| <b><i>C. jejuni</i> (n=133)</b> |            |                      |                 |                                     |                      |                               |
| pVir                            | 115        | 16                   | 2               | 0+0                                 | 0                    | 100%                          |
| pTet                            | 11         | 105                  | 2               | 2+5                                 | 8                    | 89%                           |
| pCC42                           | 22         | 97                   | 3               | 0+4                                 | 7                    | 90%                           |
| <b><i>C. coli</i> (n=81)</b>    |            |                      |                 |                                     |                      |                               |
| pVir                            | 27         | 50                   | 3               | 1+0                                 | 0                    | 98%                           |
| pTet                            | 8          | 58                   | 3               | 1+11                                | 0                    | 86%                           |
| pCC42                           | 2          | 57                   | 0               | 2+9                                 | 11                   | 75%                           |

- a. Plasmid spacers identified by CRISPRfinder, CRISPR Recognition Tool CRT and manual searches were screened for matches with *Campylobacter* plasmids using CRISPRtarget.
- b. CampyICE1-positive genomes positive for pVir, pTet and pCC42 were searched with the plasmid-targeting spacers using BLAST, and recorded for perfect matches and imperfect matches. This was to allow for possible sequence differences with the reference pVir, pTet and pCC42 plasmid sequences, or alternatively to detect mutations introduced to escape CRISPR-Cas functionality. In addition, the presence of a full-length *cas9* gene was checked, as this is required for CRISPR-Cas9 functionality.
- c. The match of the CampyICE1 CRISPR-Cas system with absence of the respective plasmids is expressed as the percentage of plasmid-negative genomes containing the CampyICE1 CRISPR-Cas system with the corresponding plasmid-recognising spacers, for example pTet in *C. coli*: 59 genomes with pTet-spacer(s) lacked the pTet plasmid, of a total of 69 genomes containing CampyICE1 with pTet-recognising spacers.

537 **LEGENDS TO FIGURES**

538

539 **Figure 1.** The CampyICE1 Cas9 protein (blue) is distinct from the previously described Cas9  
540 proteins of *C. jejuni* & *C. coli* (red), other *Campylobacter* spp. (green), and selected *Helicobacter*  
541 spp. (black). Tree was drawn using the Neighbor-Joining method based on an alignment with the  
542 MEGA7 Muscle plugin. Bootstrap values are indicated at branches which scored >95%, based on  
543 500 iterations using MEGA7, using the JTT matrix and pairwise deletion. The scale bar represents  
544 the number of amino acid substitutions per site. An alignment of a subset of Cas9 proteins with  
545 domain annotation is provided in Figure S1.

546

547 **Figure 2.** Structure and genetic conservation of of CampyICE1 from *C. jejuni* and *C. coli*. **(A)**  
548 Schematic overview of the gene structure of CampyICE1 from *C. jejuni* and *C. coli*. Genes are  
549 colored based on their predicted role: CRISPR-Cas (pink); DNase (light blue); Integration (green);  
550 Mobilisation and replication (orange); Conjugation and transfer (red); Hypothetical (black),  
551 Annotated other (yellow). The relative positions of the three CRISPR arrays and the transcriptional  
552 orientation is shown as insets. **(B)** Graphical comparison of CampyICE1 elements from *C. jejuni* and  
553 *C. coli* genomes, presented as output of a comparison of Prokka-generated annotations [38] using  
554 Clinker [43].

555

556 **Figure 3.** Distribution of mobile elements and plasmids in 5,829 *C. jejuni* genome sequences. The  
557 phylogenetic tree was based on core genome MLST. Source and 7-gene MLST information have  
558 been included for comparison.

559

560 **Figure 4.** Distribution of mobile elements and plasmids in 1,347 *C. coli* genome sequences. The  
561 phylogenetic tree was based on core genome MLST. Source and 7-gene MLST information have

562 been included for comparison.

563

564 **Figure 5.** Characteristics of the CampyICE1 CRISPR spacers, protospacers and tracrRNA, and  
565 predicted plasmid targeting by the CampyICE1 CRISPR-Cas9 system. (A) A section of the  
566 CRISPR array is shown (center) with the corresponding protospacer (top) with 8 nt flanking  
567 sequences which contain the PAM motif at the 3' end of the protospacer, represented using a  
568 sequence logo. The tracrRNA sequence and structure are included below. (B) Comparison of the  
569 CRISPR-repeats and predicted tracrRNA part of CampyICE1, *C. jejuni* and the three *C. coli* clades.  
570 The tracrRNA and CRISPR-repeat show matching changes as indicated by red underlined residues.  
571 Asterisks indicate conserved nucleotides, boxes indicate the complementary sequences in CRISPR  
572 repeat and tracrRNA. (C) Example of a CampyICE1 CRISPR spacer perfectly matching a segment  
573 of the *C. jejuni* 81-176 pVir plasmid. (D) Schematic representation of the pCC42, pTet and pVir  
574 plasmids, with the locations of distinct plasmid-targeting CampyICE1 spacers.  
575  
576

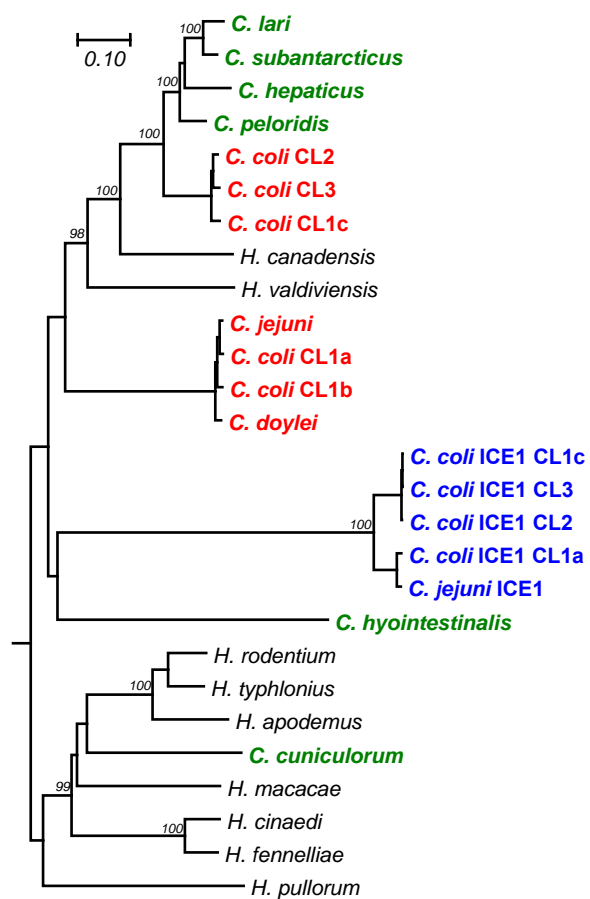

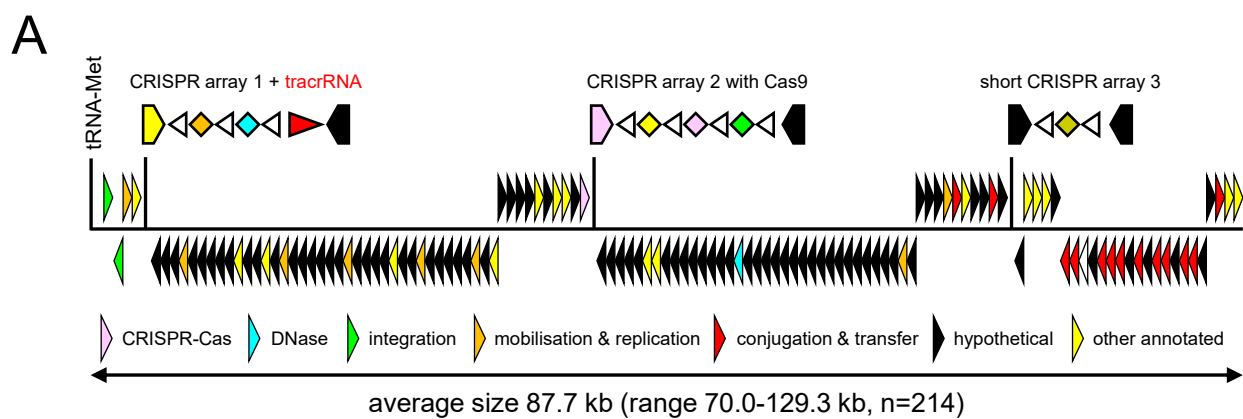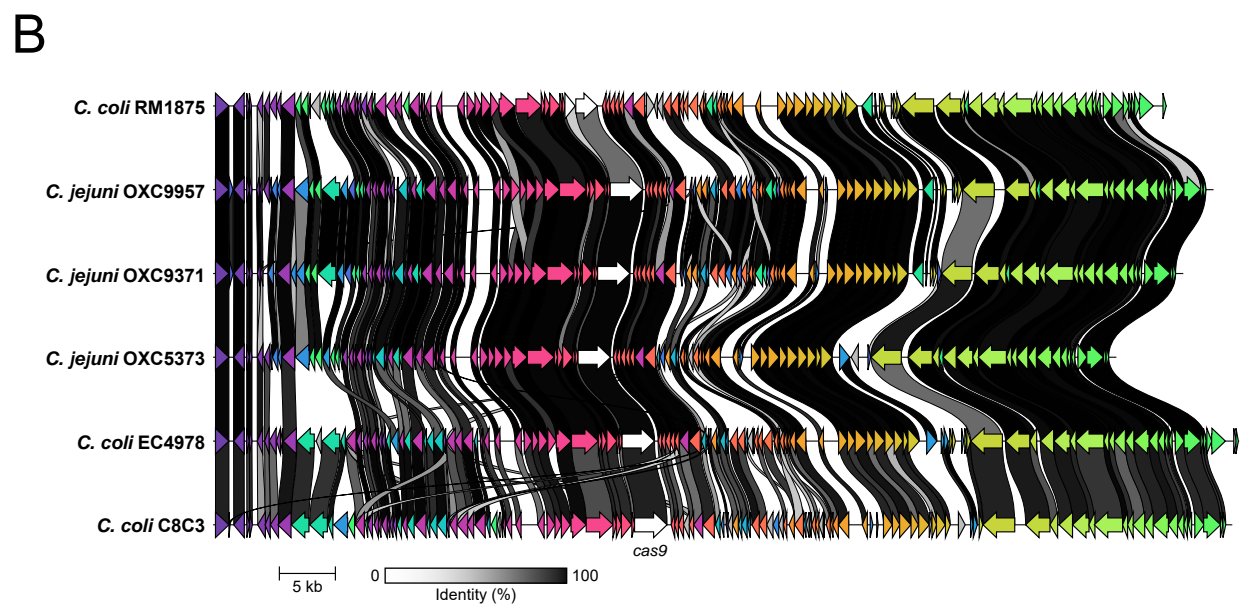

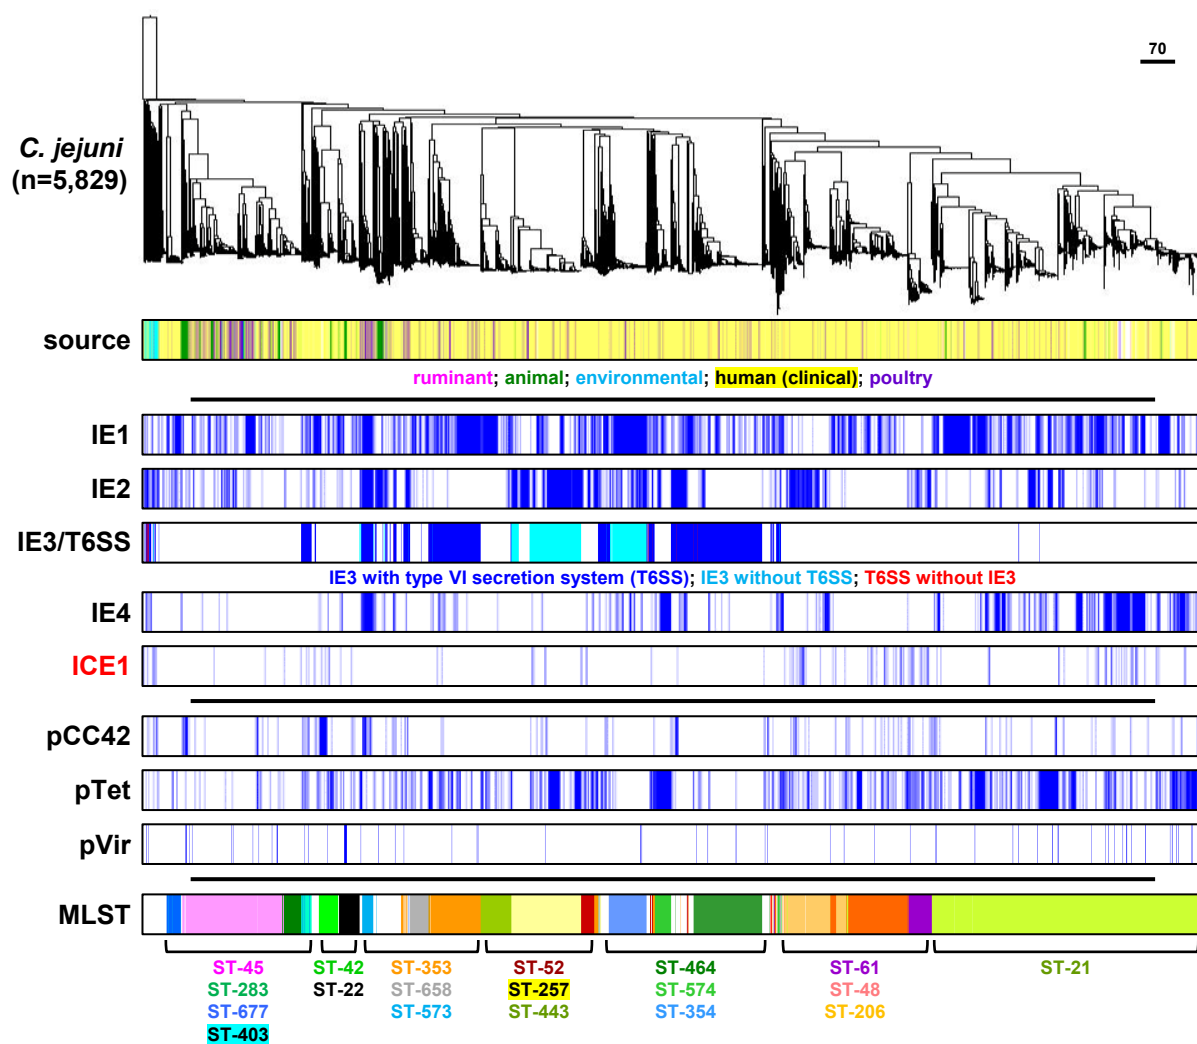



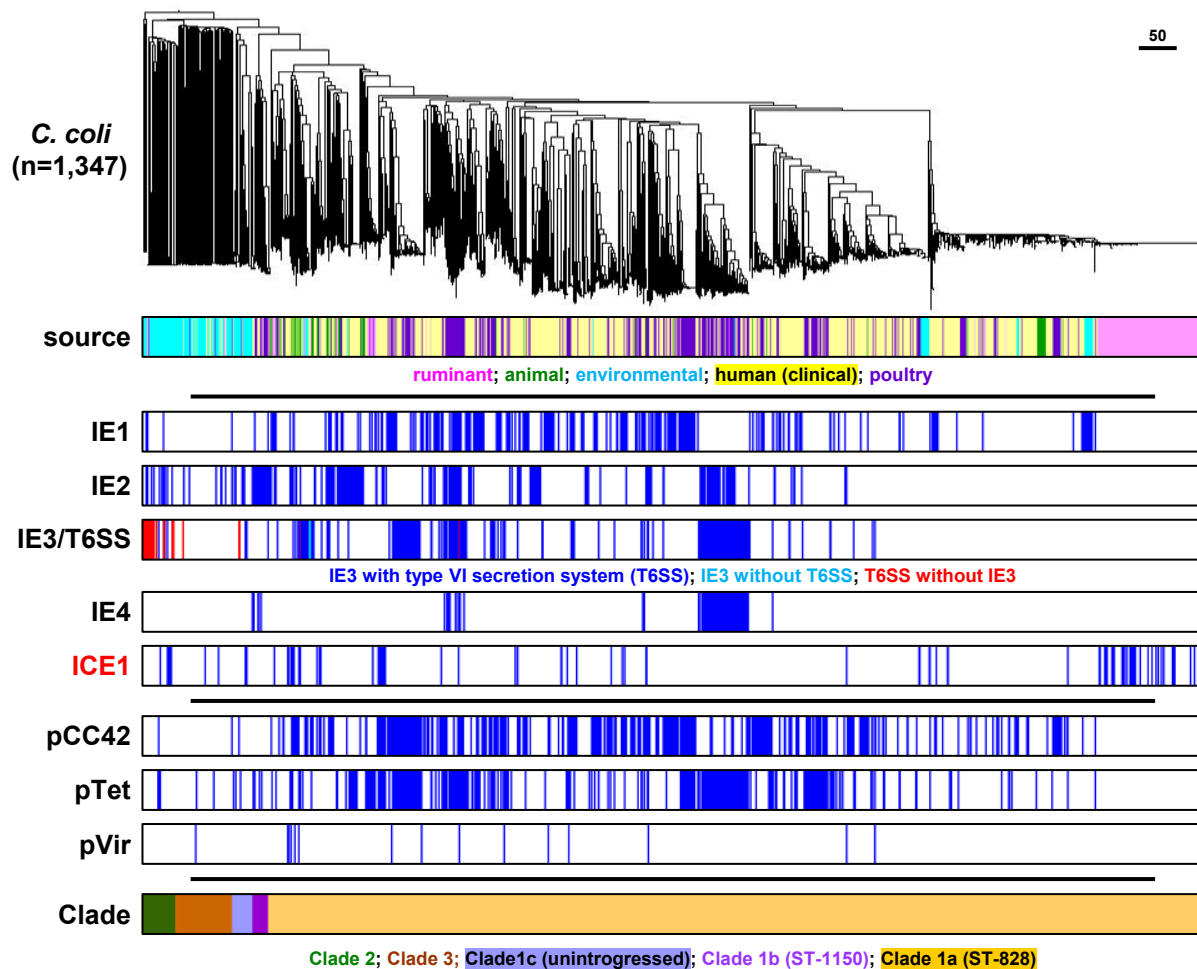

Source: http://biorxiv.org/content/10.1101/2021.06.01.446523v1.full.pdf
